# Supplementary material for: Simple synthesis of MoO2/carbon aerogel anodes for high performance lithium ion batteries from seaweed biomass
Source: Royal Society of Chemistry journal article supplement (doi:10.1039/c6ra22642f), 2016-01-01
Supplement: c6ra22642f1.pdf [file c6ra22642f1.pdf]

## Supporting Information

### Simple synthesis of MoO<sub>2</sub>/Carbon aerogels anodes for high performance lithium ion batteries from seaweed biomass

Ying Che,<sup>a</sup> Xiaoyi Zhu,<sup>\*ab</sup> Jianjiang Li,<sup>ac</sup> Jin Sun,<sup>a</sup> Yanyan Liu,<sup>a</sup> Chunde Jin,<sup>d</sup> and Zhaohong Dong<sup>\*a</sup>

<sup>a</sup> College of Textile & Clothing, Laboratory of Fiber Materials and Modern Textile, The Growing Base for State Key Laboratory, School of Environmental Science and Engineering, Qingdao University, Qingdao 266071, P R China. E-mail: xyzhu@qdu.edu.cn; dongzh11@163.com

<sup>b</sup> College of Automation and Electrical Engineering. Qingdao University, Qingdao 266071, P R China.

<sup>c</sup> Collaborative Innovation Centre for Marine Biomass Fibres, Materials and Textiles of Shandong Province, Qingdao University, Qingdao 266071, P R China.

<sup>d</sup> School of Engineering, Zhejiang A & F University, Lin`an 311300, P R China.

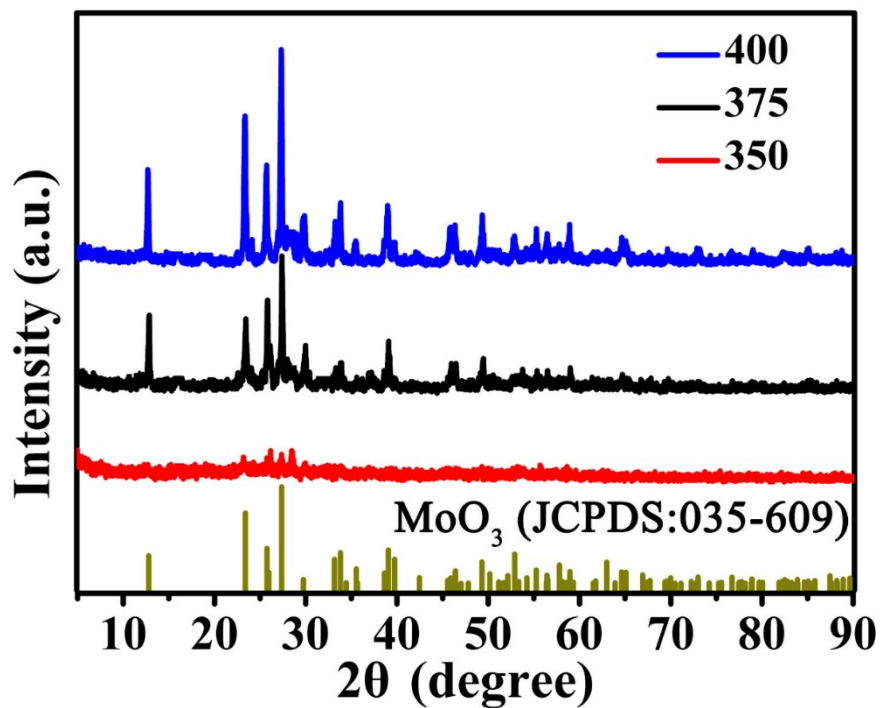

Fig. S1 XRD patterns of AMM aerogels stabilized at 350, 375 and 400 °C in air for 1 h.

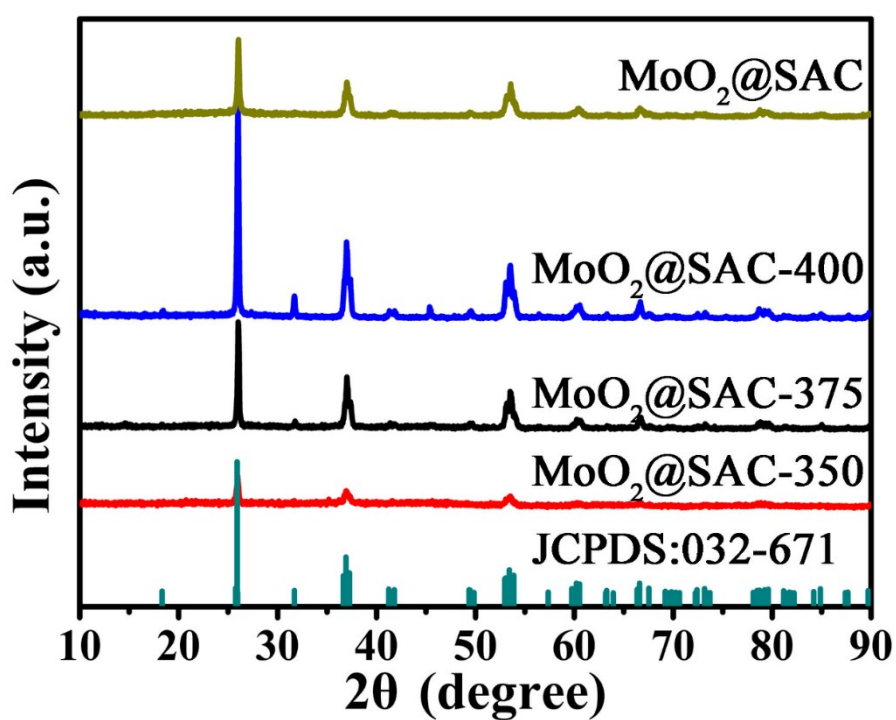

Fig. S2 XRD patterns of  $\text{MoO}_2$ @SAC-X aerogels and  $\text{MoO}_2$ @SAC aerogels which were synthesized by annealing the AMM aerogels at 600 °C under  $\text{N}_2$  without a stabilization process.

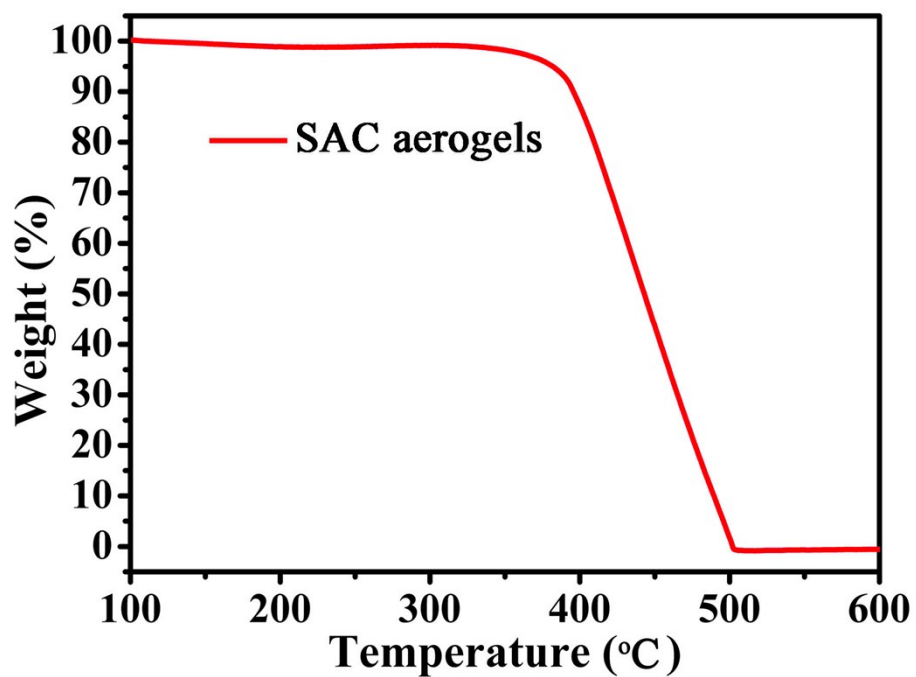

**Fig. S3** TG curve of SAC aerogels synthesized by pyrolysis of alginic acid aerogels at 600 °C under N<sub>2</sub> without a stabilization process.

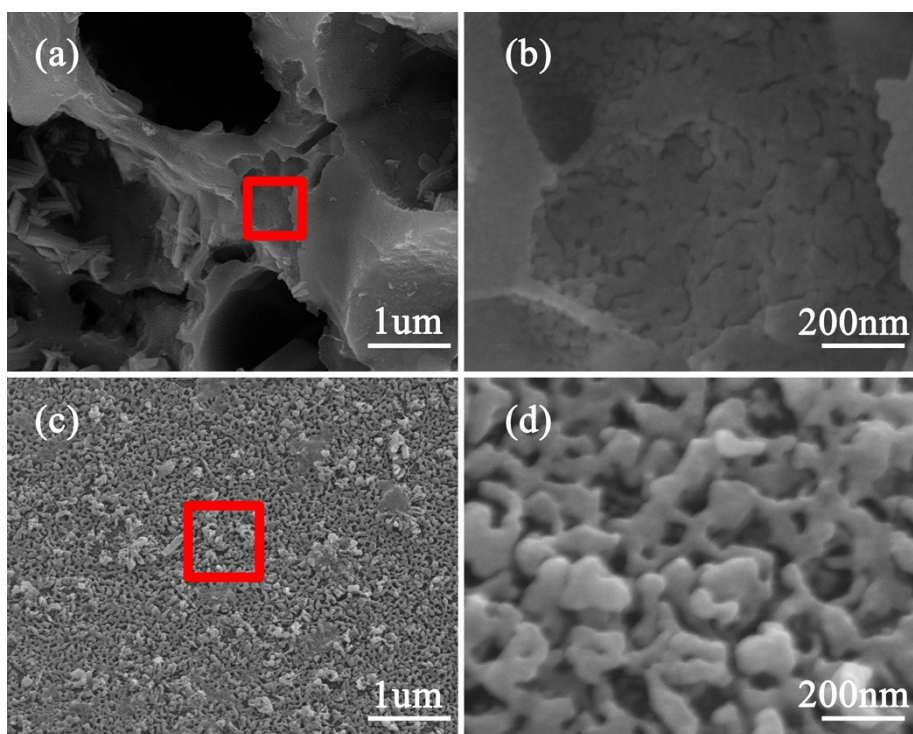

**Fig. S4** SEM images of (a, b) MoO<sub>2</sub>@SAC-350 and (c, d) MoO<sub>2</sub>@SAC-400. (b) and (d) Images showing a magnified view of the area enclosed by the red box in (a) and (c).

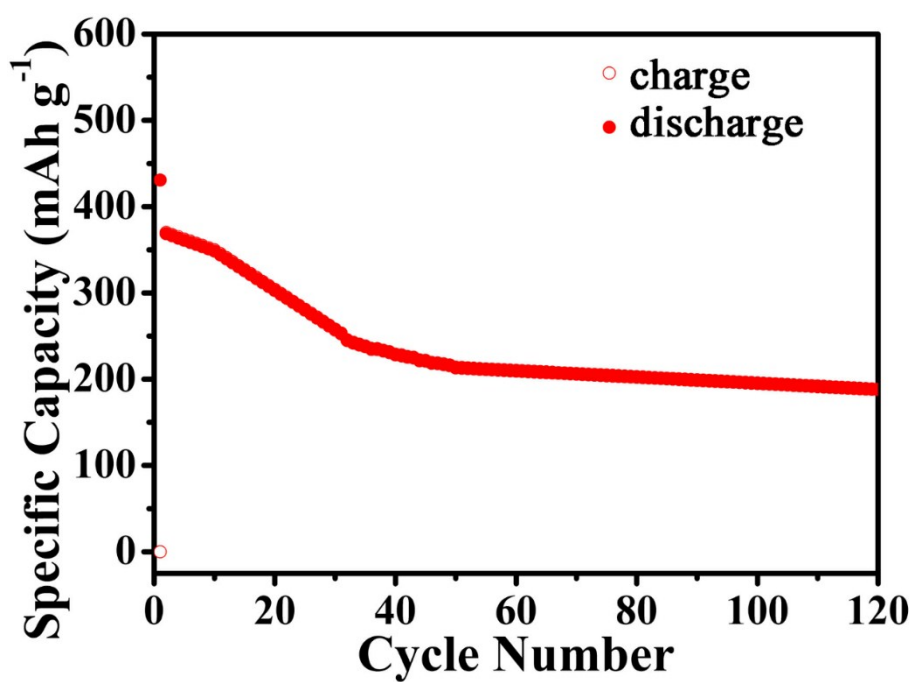

Fig. S5 Cycling performance of  $\text{MoO}_2@\text{SAC}$  electrode at current density of  $200 \text{ mA g}^{-1}$ .

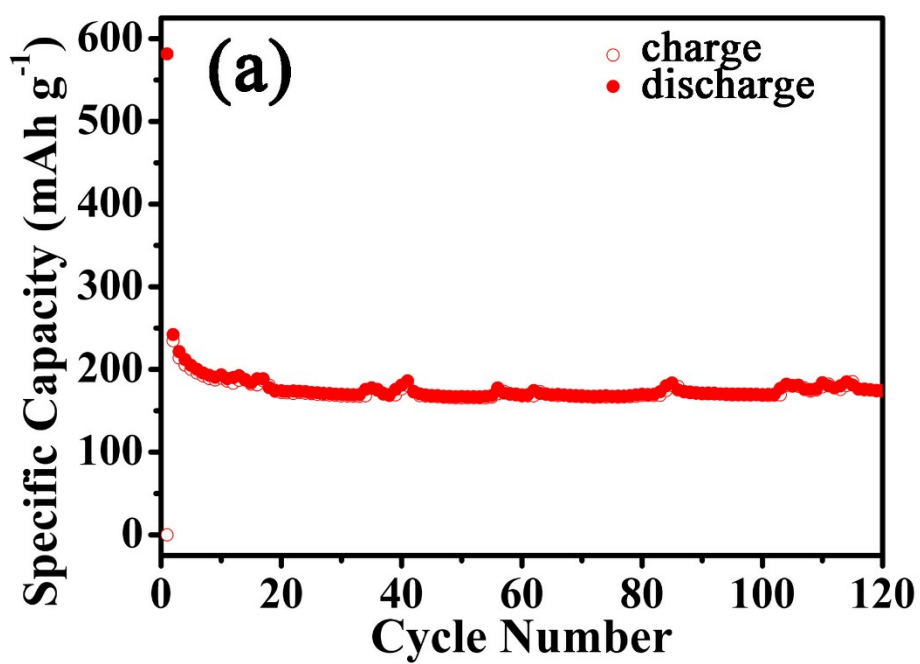

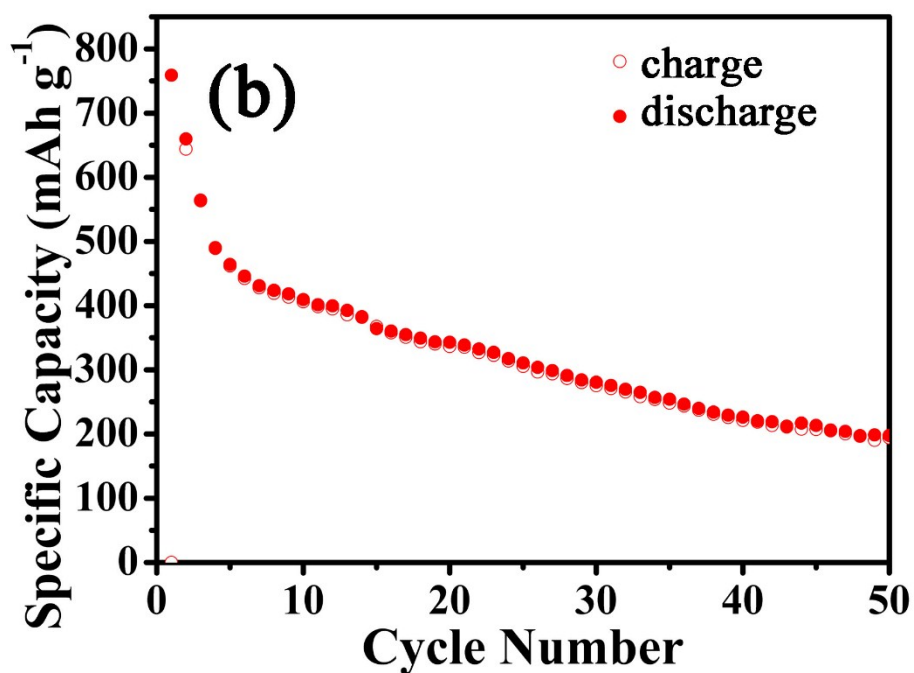

**Fig. S6** Cycling performance of (a) SAC aerogels and (b) commercial  $\text{MoO}_2$  at current density of  $200 \text{ mA g}^{-1}$ .

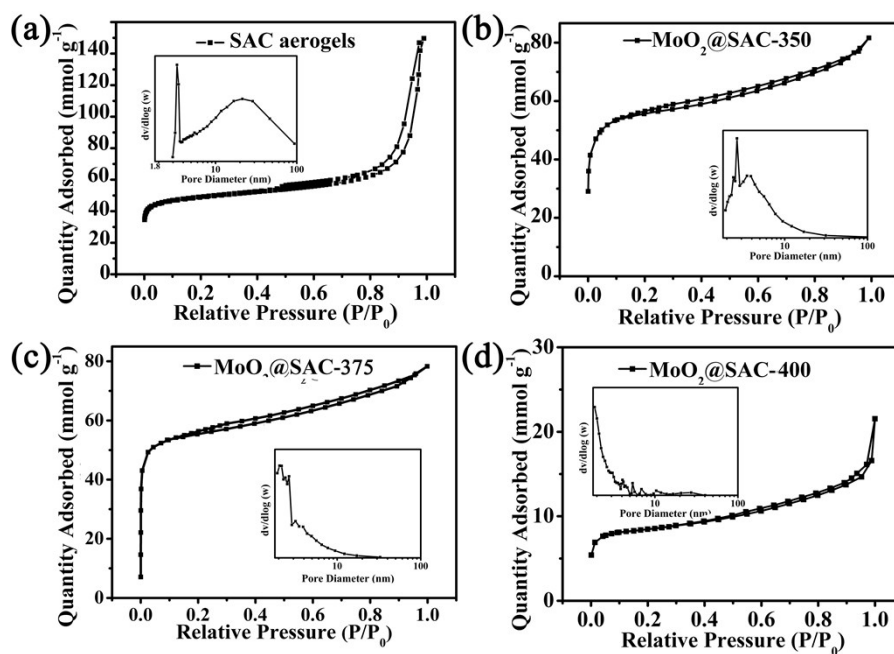

**Fig. S7** Nitrogen adsorption-desorption isotherms and the pore diameter distribution of (a) SAC aerogels, (b)  $\text{MoO}_2$ @SAC-350, (c)  $\text{MoO}_2$ @SAC-375 and (d)  $\text{MoO}_2$ @SAC-400.

**Table. S1** BET, pore volume and average pore width of SAC aerogels, MoO<sub>2</sub>@SAC-350, MoO<sub>2</sub>@SAC-375 and MoO<sub>2</sub>@SAC-400.

| Samples                   | BET Surface Area<br>/m <sup>2</sup> g <sup>-1</sup> | Adsorption volume of<br>pores /cm <sup>3</sup> g <sup>-1</sup> | Adsorption average<br>pore width /nm |
|---------------------------|-----------------------------------------------------|----------------------------------------------------------------|--------------------------------------|
| SAC aerogels              | 360.03                                              | 0.42                                                           | 18.90                                |
| MoO <sub>2</sub> @SAC-350 | 210.14                                              | 0.12                                                           | 5.21                                 |
| MoO <sub>2</sub> @SAC-375 | 196.73                                              | 0.10                                                           | 4.06                                 |
| MoO <sub>2</sub> @SAC-400 | 25.22                                               | 0.09                                                           | 3.59                                 |

**Table. S2** Comparison of electrochemical performance of MoO<sub>2</sub>/carbon composites electrodes prepared by different methods.

| Ref | Materials                                                        | Synthesis method                 | Cycle<br>numbers | Initial<br>coulombic<br>efficiency(%) | Reversible<br>capacities<br>(mA h g <sup>-1</sup> ) | Rates<br>(mA g <sup>-1</sup> ) |
|-----|------------------------------------------------------------------|----------------------------------|------------------|---------------------------------------|-----------------------------------------------------|--------------------------------|
|     | <b>MoO<sub>2</sub>/Carbon aerogels</b>                           | <b>Present study</b>             | <b>120</b>       | <b>72</b>                             | <b>490</b>                                          | <b>200</b>                     |
| 9   | MoO <sub>2</sub> /carbon<br>nanocomposites                       | Hydrothermal and<br>annealing    | 50               | 52.2                                  | 629                                                 | 200                            |
| 11  | MoO <sub>2</sub> ordered<br>mesoporous carbon<br>hybrids         | Solvothermal                     | 50               | 63.9                                  | 1049.1                                              | 100                            |
| 30  | Carbon-coated MoO <sub>2</sub><br>nanofibers                     | Electrospinning<br>and annealing | 50               | --                                    | 430.6                                               | 200                            |
| 32  | MoO <sub>2</sub> /ordered<br>mesoporous carbon<br>nanocomposites | Thermal reduction                | 50               | 61.4                                  | 689                                                 | 50                             |
| S1  | MoO <sub>2</sub> /graphene<br>composites                         | Solution and<br>annealing        | 50               | 75                                    | 640                                                 | 200                            |
| S2  | MoO <sub>2</sub> /graphene thin film                             | Layer-by-layer<br>self-assembly  | 100              | 71.5                                  | 675.9                                               | 47.8                           |
| S3  | MoO <sub>2</sub> /graphene<br>hierarchical<br>nanoarchitectures  | In-situ reduction                | 50               | 75.4                                  | 997.1                                               | 167.6                          |

|    |                                                            |                               |    |      |              |           |
|----|------------------------------------------------------------|-------------------------------|----|------|--------------|-----------|
| S4 | Carbon coated MoO <sub>2</sub> nanobelts                   | Hydrothermal and annealing    | 30 | 60   | 617.2        | 100       |
| S5 | Ultrafine MoO <sub>2</sub> nanoparticles/carbon composites | Impregnation and annealing    | 50 | 62.5 | 409          | 800       |
| S6 | MWCNTs@MoO <sub>2</sub> -C nanocable composites            | Electrospinning and annealing | 30 | --   | 832.2<br>425 | 50<br>200 |

## Notes and references

1. K. Seng, G. Du, L. Li, Z. Chen, H. Liu and Z. Guo, *J. Mater. Chem.*, 2012, **22**, 16072-16077.
2. F. Xia, X. Hu, Y. Sun, W. Luo and Y. Huang, *Nanoscale*, 2012, **4**, 4707-4711.
3. Y. Chen, X. Di, C. Ma, C. Zhu, P. Gao, J. Li, C. Sun and Q. Ouyang, *Rsc Adv.*, 2013, **3**, 17659-17663.
4. Q. Tang, Z. Shan, L. Wang and X. Qin, *Electrochim. Acta*, 2012, **79**, 148-153.
5. Y. Sun, X. Hu, W. Luo and Y. Huang, *J. Mater. Chem.*, 2011, **22**, 425-431.
6. J. Guan, L. Zhao, C. Xing and Y. Li, *Mater. Res. Express*, 2015, **2**.
